# Supplementary material for: Disrupted Functional Rich-Club Organization of the Brain Networks in Children with Attention-Deficit/Hyperactivity Disorder, a Resting-State EEG Study
Source: MDPI journal article supplement (doi:10.3390/brainsci11070938), 2021-07-16
Supplement: s1 [file s1]

## Supplementary Materials

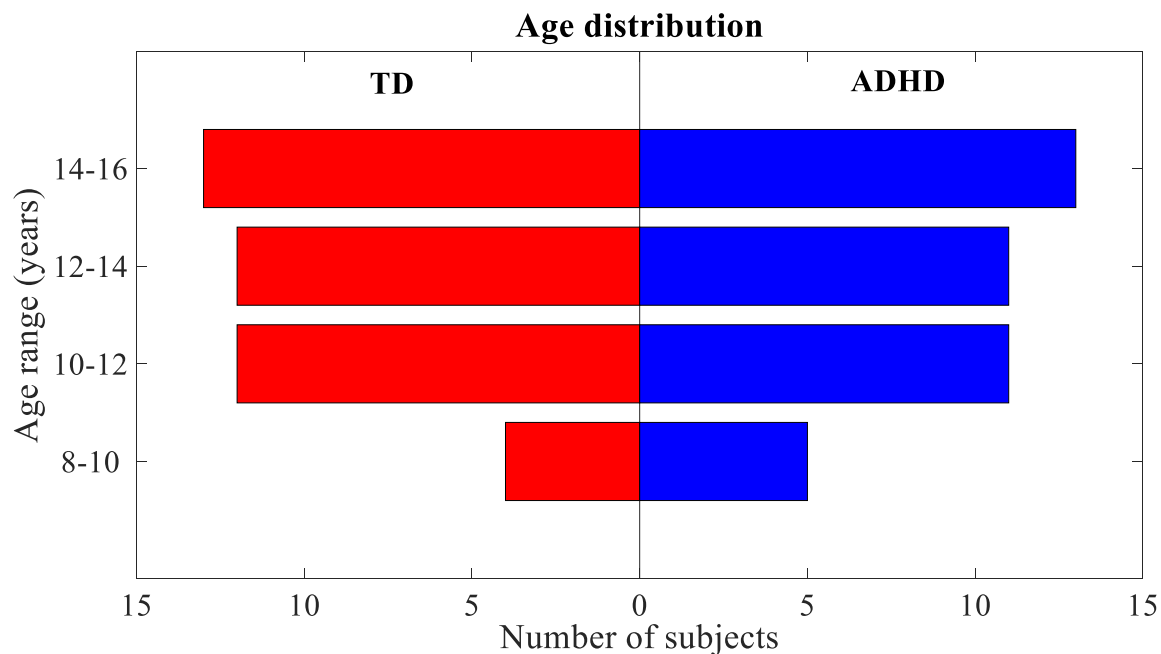

**Figure S1.** Age distribution for ADHD and TD groups.

**Table S1.** Correspondence between the brain regions shown in Figure 1 and AAL regions.

| Brain region | AAL Region           | Abbreviations | MNI coordinates |         |         |
|--------------|----------------------|---------------|-----------------|---------|---------|
|              |                      |               | X               | Y       | Z       |
| Left FR      | Frontal_Sup_L        | L-SFG         | -18.450         | 34.810  | 42.200  |
|              | Frontal_Sup_Orb_L    | L-SFGorb      | -16.560         | 47.320  | -13.310 |
|              | Frontal_Mid_L        | L-MFG         | -33.430         | 32.730  | 35.460  |
|              | Frontal_Mid_Orb_L    | L-MFGorb      | -30.650         | 50.430  | -9.6200 |
|              | Frontal_Inf_Oper_L   | L-IFGoper     | -48.430         | 12.730  | 19.020  |
|              | Frontal_Inf_Tri_L    | L-IFGtri      | -45.580         | 29.910  | 13.990  |
|              | Frontal_Inf_Orb_L    | L-IFGorb      | -35.980         | 30.710  | -12.110 |
|              | Rolandic_Oper_L      | L-ROL         | -47.160         | -8.4800 | 13.950  |
|              | Olfactory_L          | L-OLF         | -8.0600         | 15.050  | -11.460 |
|              | Frontal_Sup_Medial_L | L-SFGm        | -4.8            | 49.17   | 30.89   |
|              | Frontal_Med_Orb_L    | L-MedFGorb    | -5.17           | 54.06   | -7.4    |
|              | Rectus_L             | L-REC         | -5.08           | 37.07   | -18.14  |
|              | Insula_L             | L-INS         | -35.13          | 6.65    | 3.44    |
|              | Cingulum_Ant_L       | L-ACC         | -4.04           | 35.4    | 13.95   |
| Right FR     | Frontal_Sup_R        | R-SFG         | 21.900          | 31.120  | 43.820  |
|              | Frontal_Sup_Orb_R    | R-SFGorb      | 18.490          | 48.100  | -14.020 |
|              | Frontal_Mid_R        | R-MFG         | 37.590          | 33.060  | 34.040  |
|              | Frontal_Mid_Orb_R    | R-MFGorb      | 33.180          | 52.590  | -10.730 |
|              | Frontal_Inf_Oper_R   | R-IFGoper     | 50.200          | 14.980  | 21.410  |
|              | Frontal_Inf_Tri_R    | R-IFGtri      | 50.330          | 30.160  | 14.170  |
|              | Frontal_Inf_Orb_R    | R-IFGorb      | 41.220          | 32.230  | -11.910 |
|              | Rolandic_Oper_R      | R-ROL         | 52.650          | -6.2500 | 14.630  |
|              | Olfactory_R          | R-OLF         | 10.43           | 15.91   | -11.26  |
|              | Frontal_Sup_Medial_R | R-SFGm        | 9.1             | 50.84   | 30.22   |
|              | Frontal_Med_Orb_R    | R-MedFGorb    | 8.16            | 51.67   | -7.13   |
|              | Rectus_R             | R-REC         | 8.35            | 35.64   | -18.04  |
|              | Insula_R             | R-INS         | 39.02           | 6.25    | 2.08    |
|              | Cingulum_Ant_R       | R-ACC         | 8.46            | 37.01   | 15.84   |

|          |                      |          |         |         |        |
|----------|----------------------|----------|---------|---------|--------|
| Left CN  | Supp_Motor_Area_L    | L-SMA    | -5.3200 | 4.8500  | 61.380 |
|          | Precentral_L         | L-PreCG  | -38.650 | -5.6800 | 50.940 |
|          | Postcentral_L        | L-PoCG   | -42.46  | -22.63  | 48.92  |
|          | Paracentral_Lobule_L | L-PaCL   | -7.63   | -25.36  | 70.07  |
|          | Cingulum_Mid_L       | L-DCC    | -5.48   | -14.92  | 41.57  |
| Right CN | Supp_Motor_Area_R    | R-SMA    | 8.6200  | 4.1700  | 61.850 |
|          | Precentral_R         | R-PreCG  | 41.370  | -8.2100 | 52.090 |
|          | Postcentral_R        | R-PoCG   | 41.43   | -25.49  | 52.55  |
|          | Paracentral_Lobule_R | R-PaCL   | 7.48    | -25.59  | 68.09  |
|          | Cingulum_Mid_R       | R-DCC    | 8.02    | -8.83   | 39.79  |
| Left TP  | Temporal_Sup_L       | L-STG    | -53.16  | -20.68  | 7.130  |
|          | Temporal_Pole_Sup_L  | L-STGpol | -39.88  | 15.14   | -20.18 |
|          | Temporal_Mid_L       | L-MTG    | -55.52  | -33.80  | -2.20  |
|          | Temporal_Pole_Mid_L  | L-MTGpol | -36.32  | 14.59   | -34.08 |
|          | Temporal_Inf_L       | L-ITG    | -49.77  | -28.05  | -23.17 |
|          | Hippocampus_L        | L-HIP    | -25.03  | -20.74  | -10.13 |
|          | ParaHippocampal_L    | L-PHG    | -21.17  | -15.95  | -20.70 |
|          | Amygdala_L           | L-AMYG   | -23.27  | -0.67   | -17.14 |
| Right TP | Temporal_Sup_R       | R-STG    | 58.15   | -21.78  | 6.80   |
|          | Temporal_Pole_Sup_R  | R-STGpol | 48.25   | 14.75   | -16.86 |
|          | Temporal_Mid_R       | R-MTG    | 57.47   | -37.23  | -1.47  |
|          | Temporal_Pole_Mid_R  | R-MTGpol | 44.22   | 14.55   | -32.23 |
|          | Temporal_Inf_R       | R-ITG    | 53.69   | -31.07  | -22.32 |
|          | Hippocampus_R        | R-HIP    | 29.23   | -19.78  | -10.33 |
|          | ParaHippocampal_R    | R-PHG    | 25.38   | -15.15  | -20.47 |
|          | Amygdala_R           | R-AMYG   | 27.32   | 0.64    | -17.50 |
| Left PR  | Parietal_Sup_L       | L-SPG    | -23.45  | -59.56  | 58.96  |
|          | Parietal_Inf_L       | L-IPL    | -42.80  | -45.82  | 46.74  |
|          | SupraMarginal_L      | L-SMG    | -55.79  | -33.64  | 30.45  |
|          | Precuneus_L          | L-PCUN   | -7.24   | -56.07  | 48.01  |
|          | Angular_L            | L-ANG    | -44.14  | -60.82  | 35.59  |
|          | Cingulum_Post_L      | L-PCC    | -4.85   | -42.92  | 24.67  |
| Right PR | Parietal_Sup_R       | R-SPG    | 26.11   | -59.18  | 62.06  |
|          | Parietal_Inf_R       | R-IPL    | 46.46   | -46.29  | 49.54  |
|          | SupraMarginal_R      | R-SMG    | 57.61   | -31.50  | 34.48  |
|          | Angular_R            | R-ANG    | 45.51   | -59.98  | 38.63  |
|          | Precuneus_R          | R-PCUN   | 9.98    | -56.05  | 43.77  |
|          | Cingulum_Post_R      | R-PCC    | 7.44    | -41.81  | 21.87  |
| Left OC  | Calcarine_L          | L-CAL    | -7.14   | -78.67  | 6.44   |
|          | Cuneus_L             | L-CUN    | -5.93   | -80.13  | 27.22  |
|          | Lingual_L            | L-LING   | -14.62  | -67.56  | -4.63  |
|          | Occipital_Sup_L      | L-SOG    | -16.54  | -84.26  | 28.17  |
|          | Occipital_Mid_L      | L-MOG    | -32.39  | -80.73  | 16.11  |
|          | Occipital_Inf_L      | L-IOG    | -36.36  | -78.29  | -7.84  |
|          | Fusiform_L           | L-FFG    | -31.16  | -40.30  | -20.23 |
| Right OC | Calcarine_R          | R-CAL    | 15.99   | -73.15  | 9.40   |
|          | Cuneus_R             | R-CUN    | 13.51   | -79.36  | 28.23  |
|          | Lingual_R            | R-LING   | 16.29   | -66.93  | -3.87  |
|          | Occipital_Sup_R      | R-SOG    | 24.29   | -80.85  | 30.59  |
|          | Occipital_Mid_R      | R-MOG    | 37.39   | -79.70  | 19.42  |
|          | Occipital_Inf_R      | R-IOG    | 38.16   | -81.99  | -7.61  |
|          | Fusiform_R           | R-FFG    | 33.97   | -39.10  | -20.18 |

FR: frontal regions; TP: temporal regions; CN: central regions; PR: parietal regions; OC: occipital regions.
